# Supplementary material
Source: publisher site journal article supplement (https://www.dovepress.com/get_supplementary_file.php?f=295183.docx)

**Supplementary Tables**

**Supplementary Table 1** HealthStat database diagnostic read codes for COPD

| **Read code** | **Description** |
| --- | --- |
| 222I.00 | Blue bloater |
| 663K.00 | Airways obstruction irreversible |
| 66YB000 | Chronic obstructive pulmonary disease 3 monthly review |
| 66YB100 | Chronic obstructive pulmonary disease 6 monthly review |
| 66YM.00 | Chronic obstructive pulmonary disease annual review |
| H061400 | Obliterating fibrous bronchiolitis |
| H3...00 | Chronic obstructive pulmonary disease |
| H3...11 | Chronic obstructive airways disease |
| H31..00 | Chronic bronchitis |
| H310.00 | Simple chronic bronchitis |
| H310000 | Chronic catarrhal bronchitis |
| H310z00 | Simple chronic bronchitis NOS |
| H311.00 | Mucopurulent chronic bronchitis |
| H311000 | Purulent chronic bronchitis |
| H311100 | Fetid chronic bronchitis |
| H311z00 | Mucopurulent chronic bronchitis NOS |
| H312.00 | Obstructive chronic bronchitis |
| H312100 | Emphysematous bronchitis |
| H312300 | Bronchiolitis obliterans |
| H312z00 | Obstructive chronic bronchitis NOS |
| H313.00 | Mixed simple and mucopurulent chronic bronchitis |
| H31y.00 | Other chronic bronchitis |
| H31y100 | Chronic tracheobronchitis |
| H31yz00 | Other chronic bronchitis NOS |
| H31z.00 | Chronic bronchitis NOS |
| H32..00 | Emphysema |
| H320.00 | Chronic bullous emphysema |
| H320000 | Segmental bullous emphysema |
| H320100 | Zonal bullous emphysema |
| H320200 | Giant bullous emphysema |
| H320300 | Bullous emphysema with collapse |
| H320z00 | Chronic bullous emphysema NOS |
| H321.00 | Panlobular emphysema |
| H322.00 | Centrilobular emphysema |
| H32y.00 | Other emphysema |
| H32y000 | Acute vesicular emphysema |
| H32y100 | Atrophic (senile) emphysema |
| H32y111 | Acute interstitial emphysema |
| H32y200 | MacLeod's unilateral emphysema |
| H32yz00 | Other emphysema NOS |
| H32z.00 | Emphysema NOS |
| H36..00 | Mild chronic obstructive pulmonary disease |
| H37..00 | Moderate chronic obstructive pulmonary disease |
| H38..00 | Severe chronic obstructive pulmonary disease |
| H39..00 | Very severe chronic obstructive pulmonary disease |
| H3A..00 | End stage chronic obstructive airways disease |
| H3y..00 | Other specified chronic obstructive airways disease |
| H3y..11 | Other specified chronic obstructive pulmonary disease |
| H3z..00 | Chronic obstructive airways disease NOS |
| H3z..11 | Chronic obstructive pulmonary disease NOS |
| H464000 | Chronic emphysema due to chemical fumes |
| H464100 | Obliterative bronchiolitis due to chemical fumes |
| H564.00 | Bronchiolitis obliterans organising pneumonia |
| H564.11 | Cryptogenic organising pneumonia |
| H581.00 | Interstitial emphysema |
| H582.00 | Compensatory emphysema |
| H583200 | Eosinophilic bronchitis |
| Hyu3000 | [X]Other emphysema |
| Hyu3100 | [X]Other specified chronic obstructive pulmonary disease |
| 663k.00 | Reversibility trial by steroids |
| 66Ym.00 | Inhaler device in use |
| H310100 | Smokers' cough |
| H312000 | Chronic asthmatic bronchitis |
| H312011 | Chronic wheezy bronchitis |
| H312200 | Acute exacerbation of chronic obstructive airways disease |
| H31y000 | Chronic tracheitis |
| H320311 | Tension pneumatocoele |
| H3y0.00 | Chronic obstruct pulmonary disease with acute lower resp infection |
| H3y1.00 | Chron obstruct pulmonary disease with acute exacerbation, unspecified |
| H440.00 | Byssinosis |
| H464.00 | Chronic respiratory conditions due to chemical fumes |
| H464200 | Chronic pulmonary fibrosis due to chemical fumes |
| H464z00 | Chronic respiratory conditions due to chemical fumes NOS |
| H581.11 | Pneumomediastinum |
| Hyu3.00 | [X]Chronic lower respiratory diseases |

**Abbreviations:** COPD, chronic obstructive pulmonary disease; NOS, not otherwise specified.

**Supplementary Table 2** HealthStat database diagnostic read codes incompatible with COPD

| **Read code** | **Description** |
| --- | --- |
| 14S9.00 | H/O: lung recipient |
| 23E5.00 | O/E - fibrosis of lung present |
| 23E5.11 | O/E - fibrosis of lung |
| 7448100 | Excision of cyst of bronchus |
| 7450.00 | Transplantation of lung |
| 7450000 | Double lung transplant |
| 7450100 | Single lung transplant |
| 7450y00 | Other specified transplantation of lung |
| 7450z00 | Transplantation of lung NOS |
| 7451.00 | Excision of lung |
| 7451.11 | Pneumonectomy operations |
| 7451000 | Total pneumonectomy |
| 7451011 | Pneumonectomy |
| 7451100 | Bilobectomy of lung |
| 7451200 | Lobectomy of lung |
| 7451211 | Pulmonary lobectomy |
| 7451300 | Excision of segment of lung |
| 7451311 | Pulmonary segmentectomy |
| 7451400 | Partial lobectomy of lung NEC |
| 7451y00 | Other specified excision of lung |
| 7451z00 | Excision of lung NOS |
| 7900.00 | Transplantation of heart and lung |
| 7900000 | Allotransplantation of heart and lung |
| 7900z00 | Transplantation of heart and lung NOS |
| A114.00 | Tuberculous fibrosis of lung |
| A115.00 | Tuberculous bronchiectasis |
| C10N100 | Cystic fibrosis related diabetes mellitus |
| C350300 | Idiopathic pulmonary haemosiderosis |
| C370.00 | Cystic fibrosis |
| C370.12 | Mucoviscidosis |
| C370000 | Cystic fibrosis with no meconium ileus |
| C370100 | Cystic fibrosis with meconium ileus |
| C370111 | Meconium ileus in cystic fibrosis |
| C370200 | Cystic fibrosis with pulmonary manifestations |
| C370300 | Cystic fibrosis with intestinal manifestations |
| C370400 | Arthropathy in cystic fibrosis |
| C370500 | Cystic fibrosis with distal intestinal obstruction syndrome |
| C370800 | Cystic fibrosis related cirrhosis |
| C370y00 | Cystic fibrosis with other manifestations |
| C370z00 | Cystic fibrosis NOS |
| H34..00 | Bronchiectasis |
| H340.00 | Recurrent bronchiectasis |
| H341.00 | Post-infective bronchiectasis |
| H34z.00 | Bronchiectasis NOS |
| H423.00 | Massive silicotic fibrosis |
| H431.00 | Bauxite fibrosis of lung |
| H433.00 | Graphite fibrosis of lung |
| H464200 | Chronic pulmonary fibrosis due to chemical fumes |
| H48..00 | Progressive massive fibrosis |
| H4y1.00 | Chronic pulmonary radiation disease |
| H4y1000 | Chronic pulmonary fibrosis following radiation |
| H4y1z00 | Chronic pulmonary radiation disease NOS |
| H4y2.00 | Drug-induced interstitial lung disorders |
| H4y2000 | Acute drug-induced interstitial lung disorders |
| H4y2100 | Chronic drug-induced interstitial lung disorders |
| H55..00 | Postinflammatory pulmonary fibrosis |
| H561.00 | Idiopathic pulmonary haemosiderosis |
| H563100 | Diffuse pulmonary fibrosis |
| H58y300 | Interstitial lung disease NEC |
| H58y500 | Respiratory bronchiolitis associated interstitial lung dis |
| H58y700 | Interstitial lung disease due to connective tissue disease |
| Hyu5000 | [X]Other interstitial pulmonary diseases with fibrosis |
| P84..00 | Congenital cystic lung |
| P840.00 | Congenital cystic lung disease, unspecified |
| P841.00 | Congenital polycystic lung |
| P841.11 | Multiple lung cysts |
| P841.12 | Multiple congenital bronchogenic cysts |
| P842.00 | Congenital honeycomb lung |
| P843.00 | Single lung cyst |
| P843.11 | Lung cyst |
| P843.12 | Congenital bronchogenic cyst |
| P844.00 | Congenital cystic adenomatoid malformation of the lung |
| P84y.00 | Other specified congenital cystic lung |
| P84z.00 | Congenital cystic lung NOS |
| P85..00 | Lung agenesis, hypoplasia and dysplasia |
| P850.00 | Aplasia of lung |
| P853.00 | Agenesis of lung |
| P853.11 | Congenital absence of lung |
| P853000 | Congenital absence of lung fissures |
| P853100 | Congenital absence of lobe of lung |
| P853z00 | Agenesis of lung NOS |
| P85y.00 | Other specified lung agenesis, hypoplasia or dysplasia |
| P85yz00 | Other lung agenesis, hypoplasia or dysplasia NOS |
| P85z.00 | Lung agenesis, hypoplasia or dysplasia NOS |
| P861.00 | Congenital bronchiectasis |
| Q317100 | Prematurity with interstitial pulmonary fibrosis |
| ZV42600 | [V]Lung transplanted |
| ZV6G200 | [V]Acquired absence of part of lung |
| 7451500 | Reduction of lung volume |
| C370.11 | Fibrocystic disease |
| H43..00 | Pneumoconiosis due to other inorganic dust |
| H432.00 | Berylliosis |
| H434.00 | Siderosis |
| H435.00 | Stannosis |
| H43z.00 | Pneumoconiosis due to inorganic dust NOS |
| P731.00 | Pulmonary artery agenesis |
| P731.11 | Congenital absence of pulmonary artery |
| P851.00 | Hypoplasia of lung |
| P852.00 | Sequestration of lung |
| P85y000 | Fusion of lobes of lung |

**Abbreviations:** COPD, chronic obstructive pulmonary disease; H/O NES, not elsewhere classified; NOS, not otherwise specified.

**Supplementary Figures**

**Supplementary Figure 1** Diagram of treatment pattern modifications: (A) direct switch to another MITT; (B) retreatment with MITT; (C) step down; and (D) discontinuation


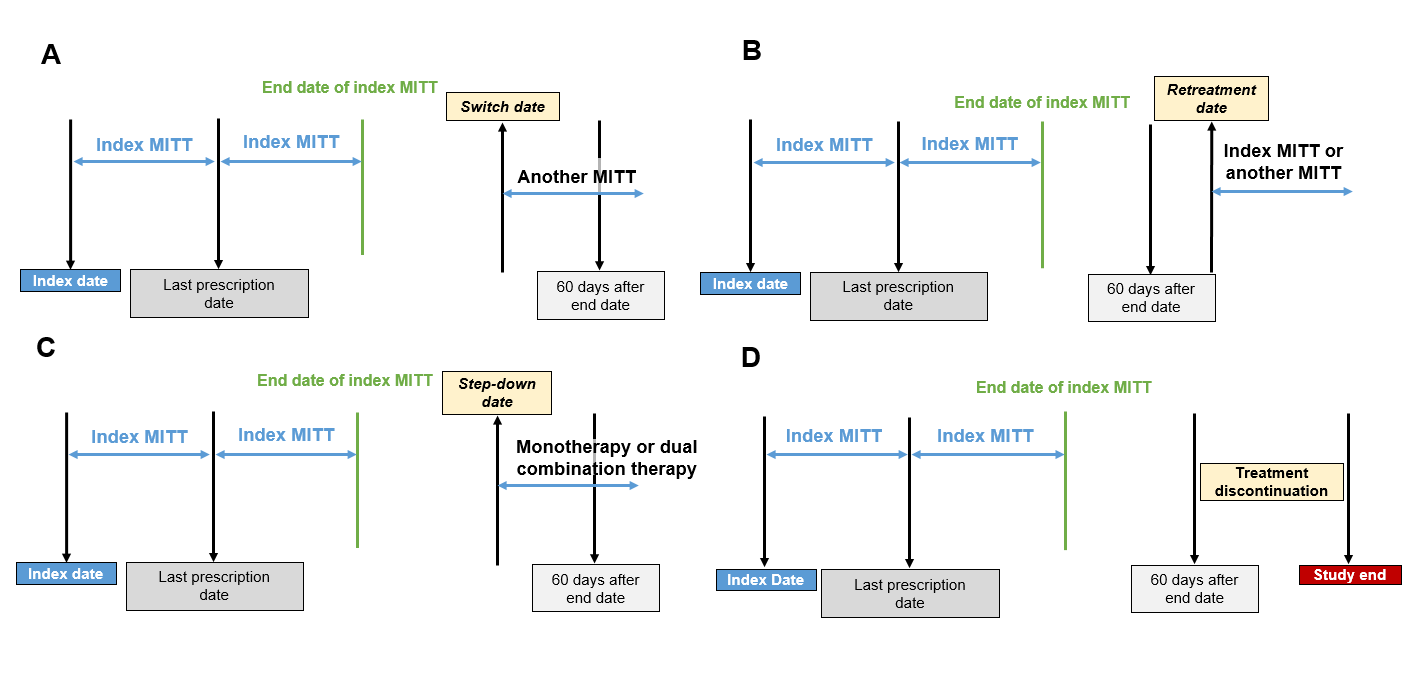

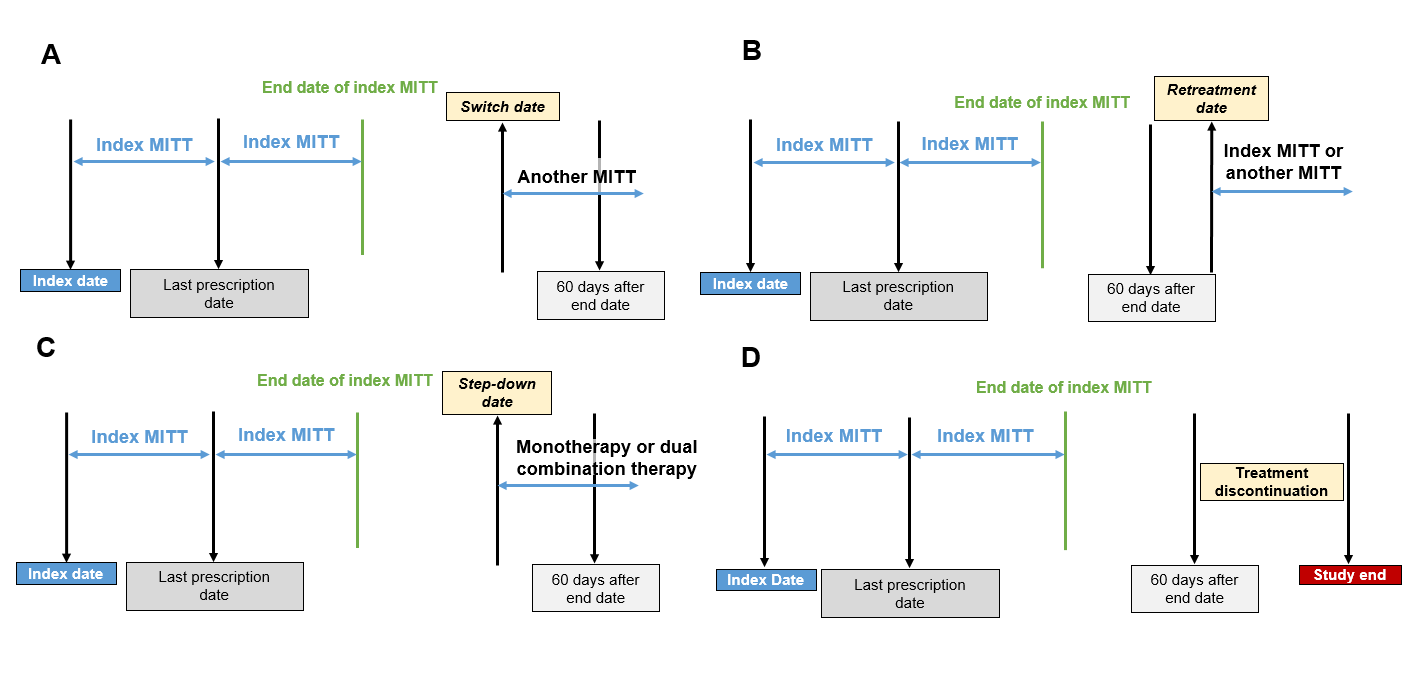


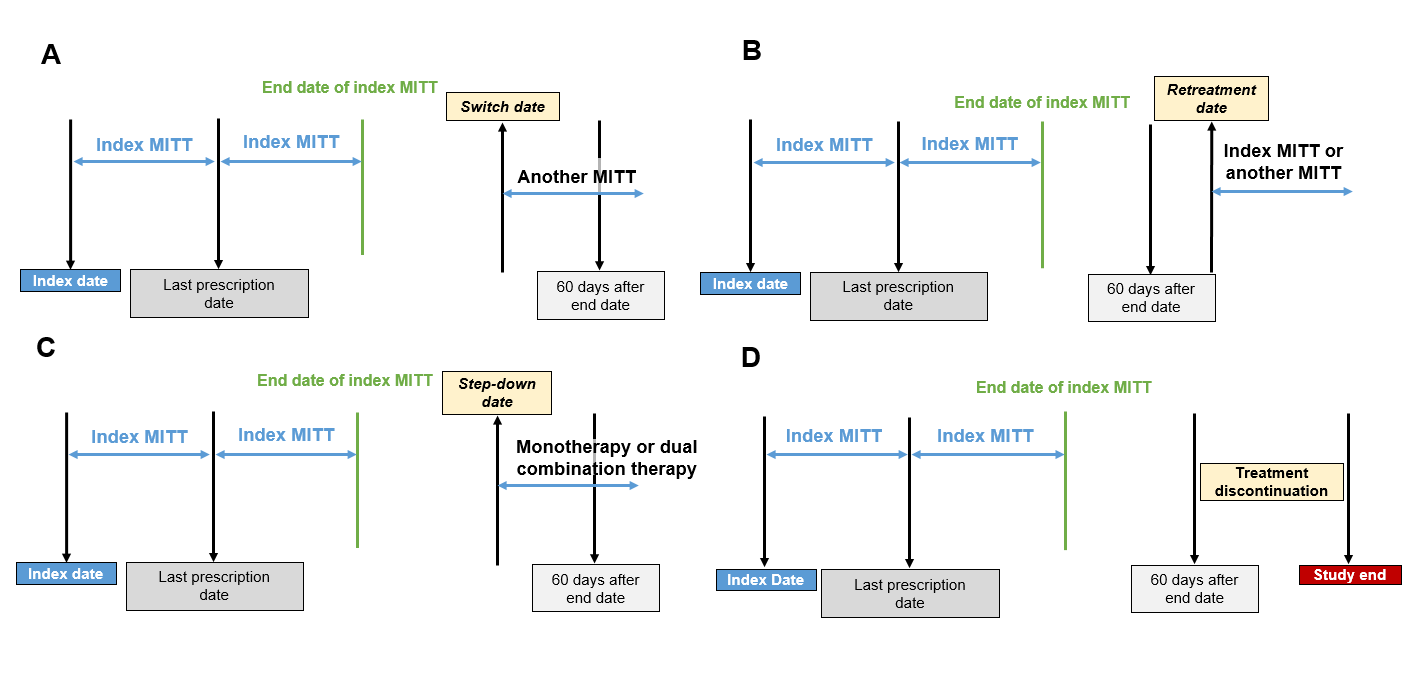


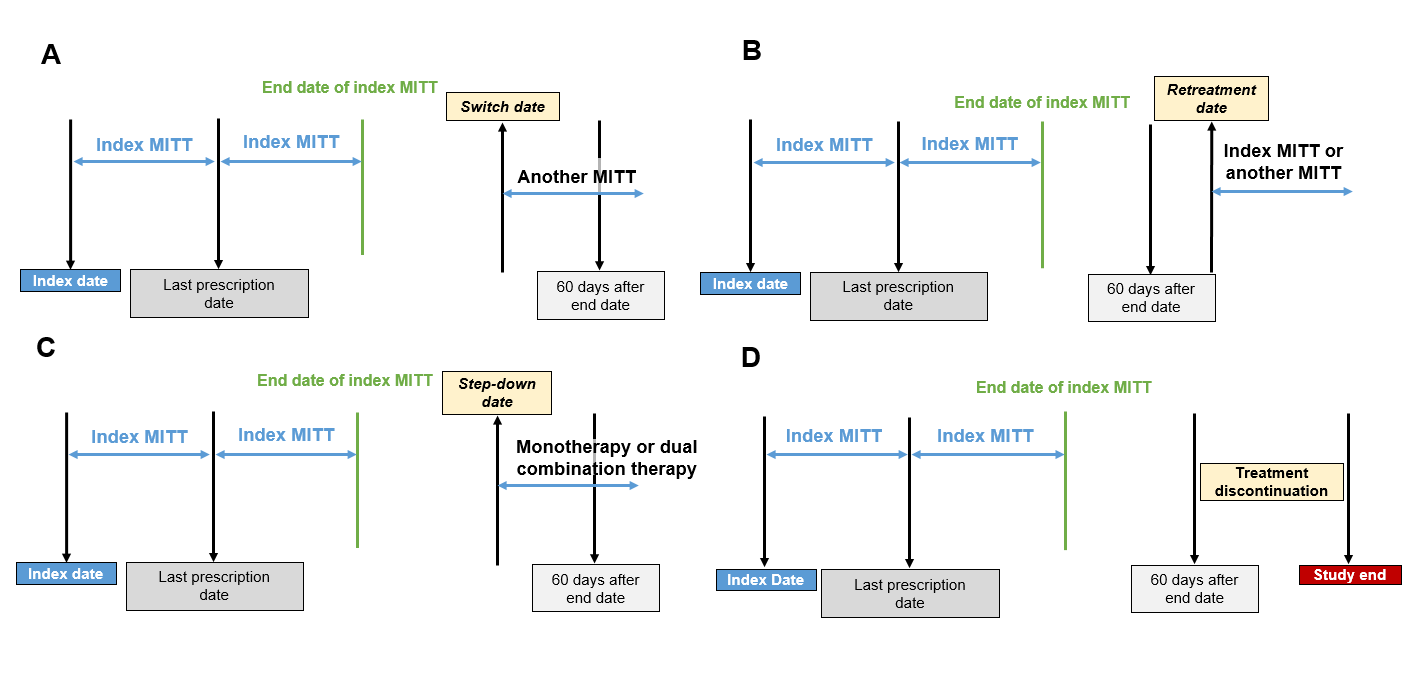

Supplement: Supplementary file 1 [file get_supplementary_file.php]
